# Supplementary material for: Highly selective detection of histidine using o-phthaldialdehyde derivatization after the removal of aminothiols through Tween 20-capped gold nanoparticles
Source: Royal Society of Chemistry journal article supplement (doi:10.1039/b900028c), 2009-01-01
Supplement: b900028c.pdf [file b900028c.pdf]

**Highly Selective Detection of Histidine Using *o*-Phthaldialdehyde Derivatization  
After the Removal of Amino Thiols Through Tween 20-capped Gold Nanoparticles**

Chia-Chi Huang<sup>a</sup>, and Wei-Lung Tseng<sup>a, b\*</sup>

<sup>a</sup> Department of Chemistry, National Sun Yat-sen University, Taiwan

<sup>b</sup> National Sun Yat-sen University-Kaohsiung Medical University Joint Research  
Center, Kaohsiung, Taiwan

**Correspondence:** Dr. Wei-Lung Tseng, Department of Chemistry, National Sun  
Yat-sen University, 70, Lien-hai Road, Kaohsiung, Taiwan 804.

**E-mail:** tsengwl@mail.nsysu.edu.tw

**Fax:** 011-886-7-3684046.

Electronic supplementary information (ESI) available: the optimal conditions for the  
derivatization of histidine with OPA

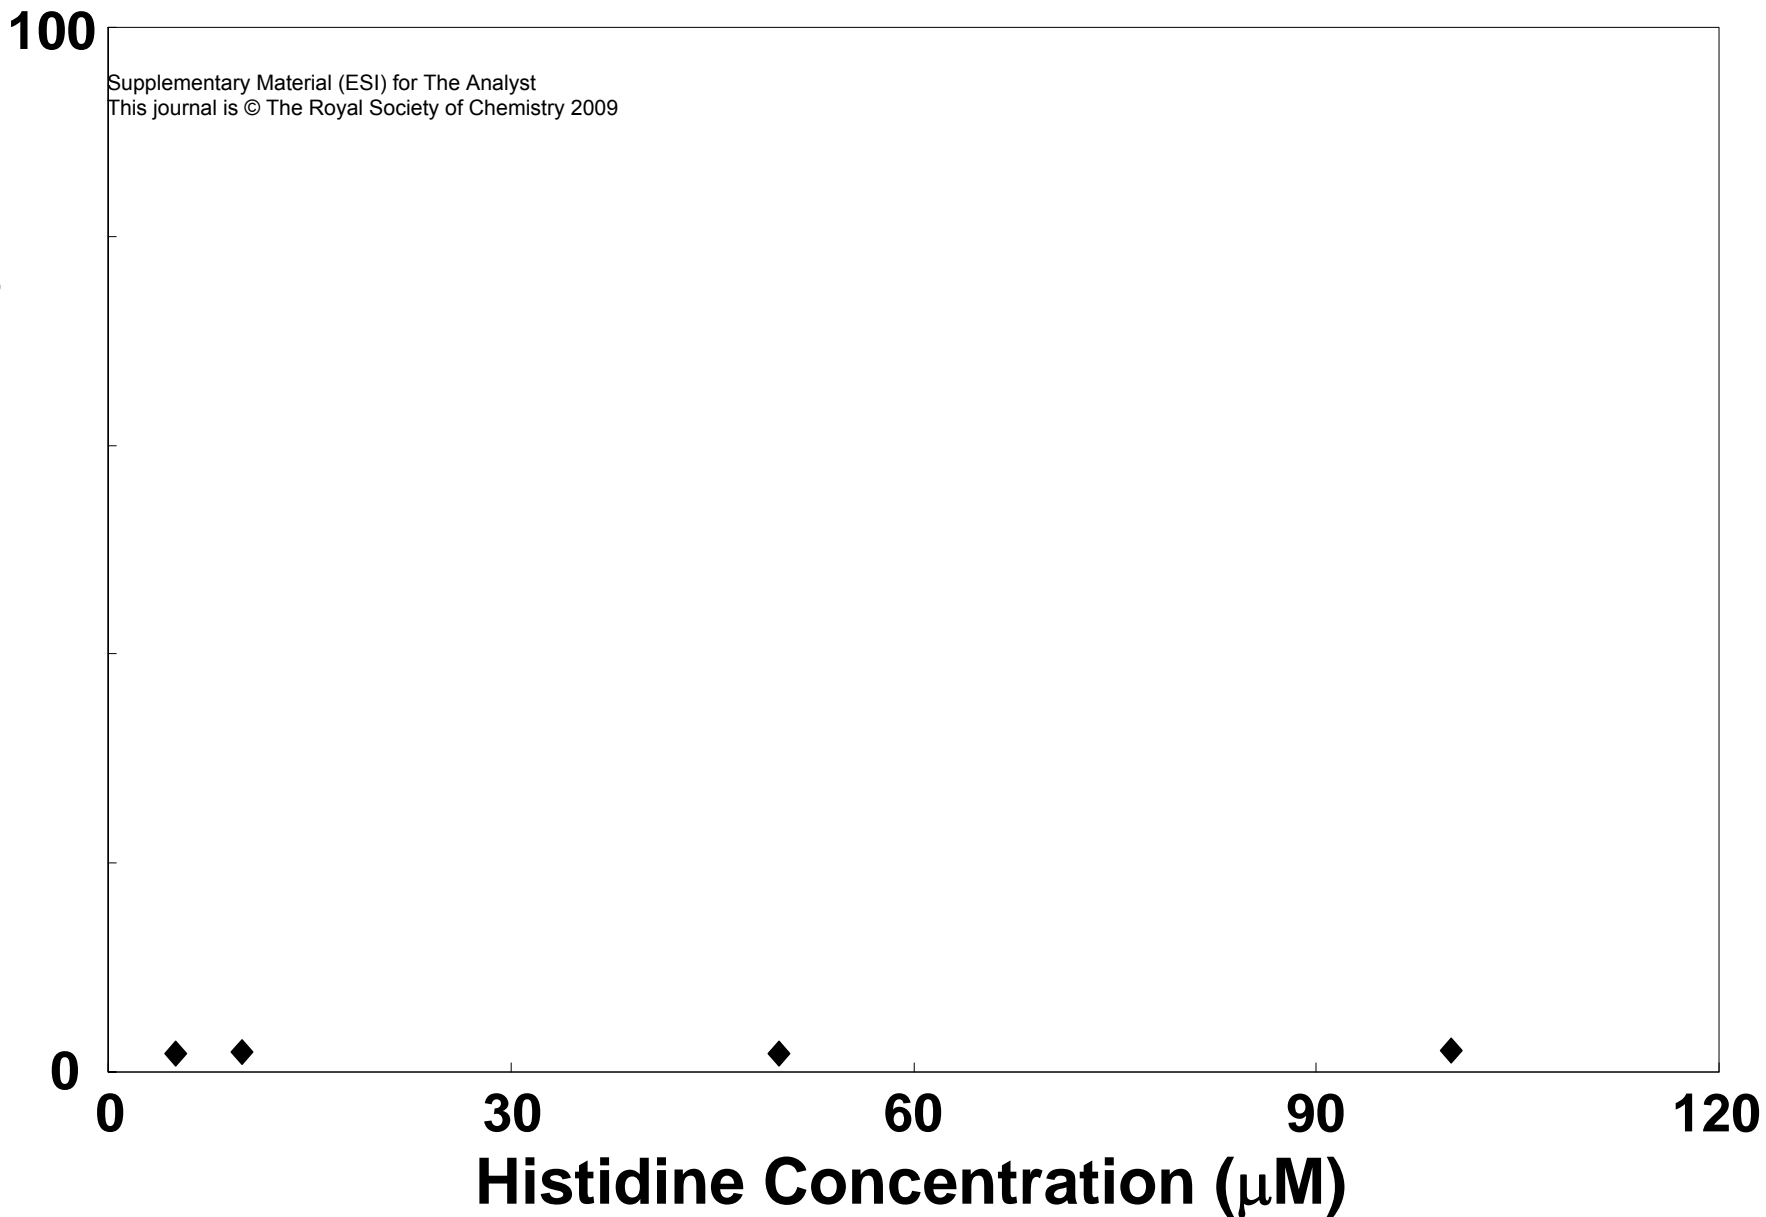

**Figure S1.** Effect of histidine concentration on the removal of histidine with Tween 20-AuNPs. The supernatant was obtained by centrifugation of a solution containing 5-100  $\mu\text{M}$  histidine, 48.0 nM Tween 20-AuNPs and 0.1 mM CTAB. Then, the supernatant was derivatized with a solution of 1 mM OPA and 0.05 M NaOH. After 10 min, the fluorescence intensity (IF) of OPA derivatives was measured by excitation at 360 nm.

2000

Supplementary Material (ESI) for The Analyst  
This journal is © The Royal Society of Chemistry 2009 $I_F$  (a. u.)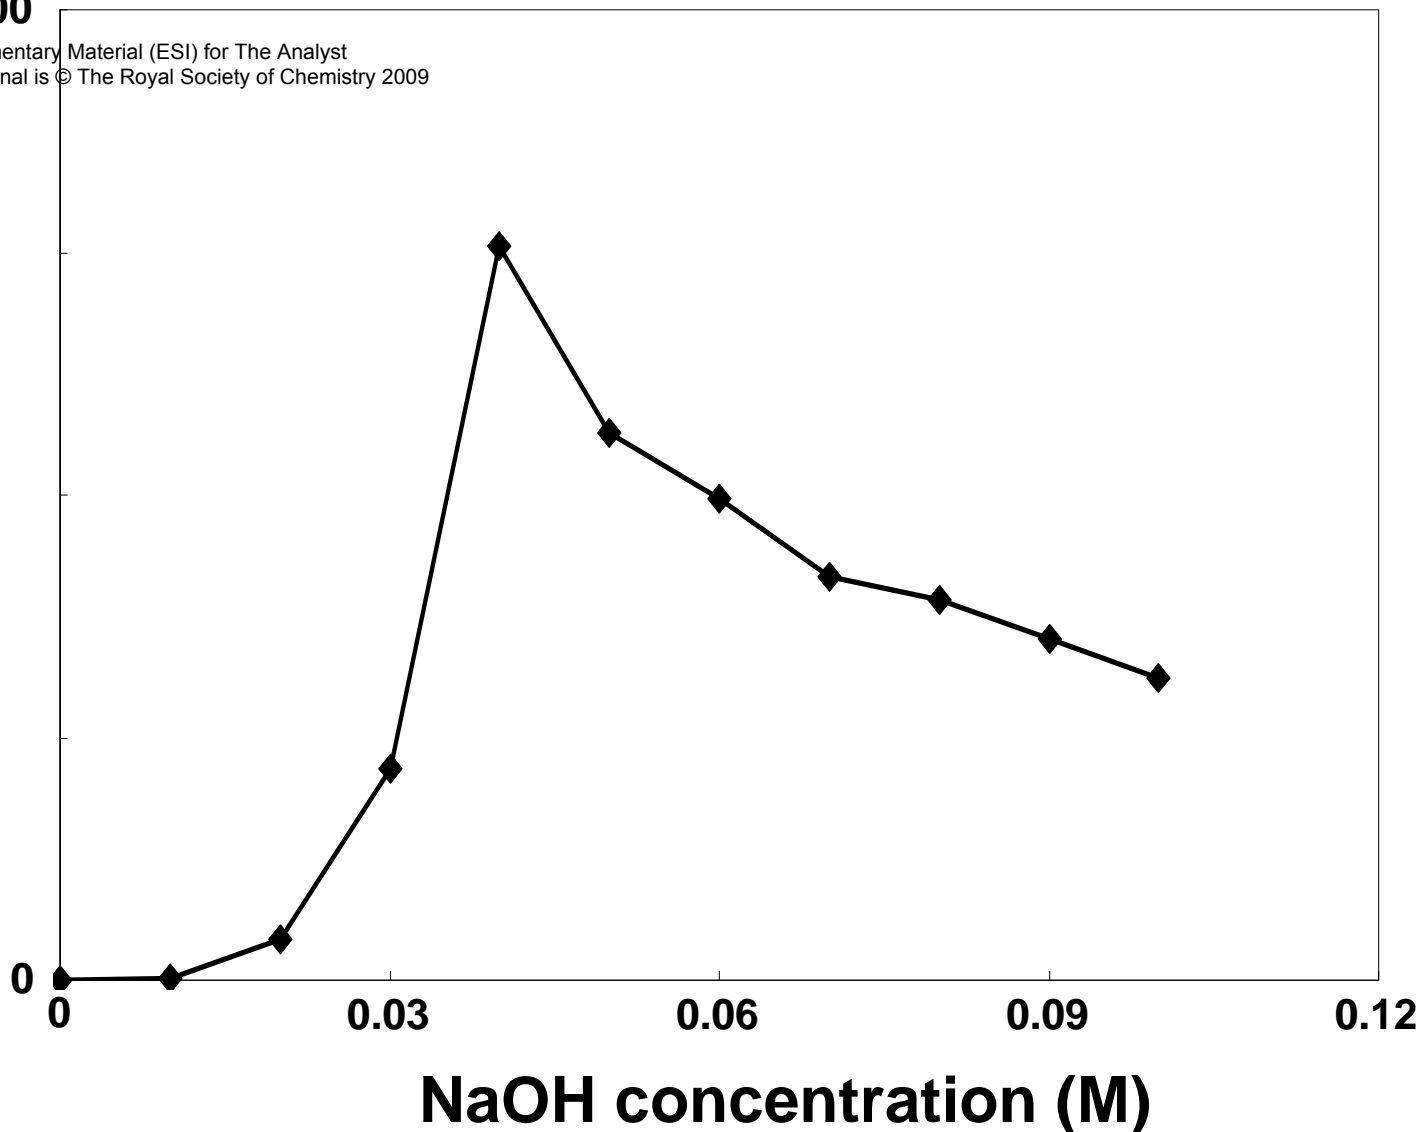

**Figure S2.** The effect of NaOH on the OPA derivatization of histidine. The supernatant was obtained by centrifugation of a solution of 10  $\mu$ M histidine, 48.0 nM Tween 20-AuNPs and 0.1 mM CTAB. Then, the supernatant was derivatized with a solution of 1 mM OPA and 0–0.1 M NaOH. Tween 20-AuNPs were prepared in 40 mM phosphate solution at pH 2.0. The excitation wavelength was set at 360 nm.

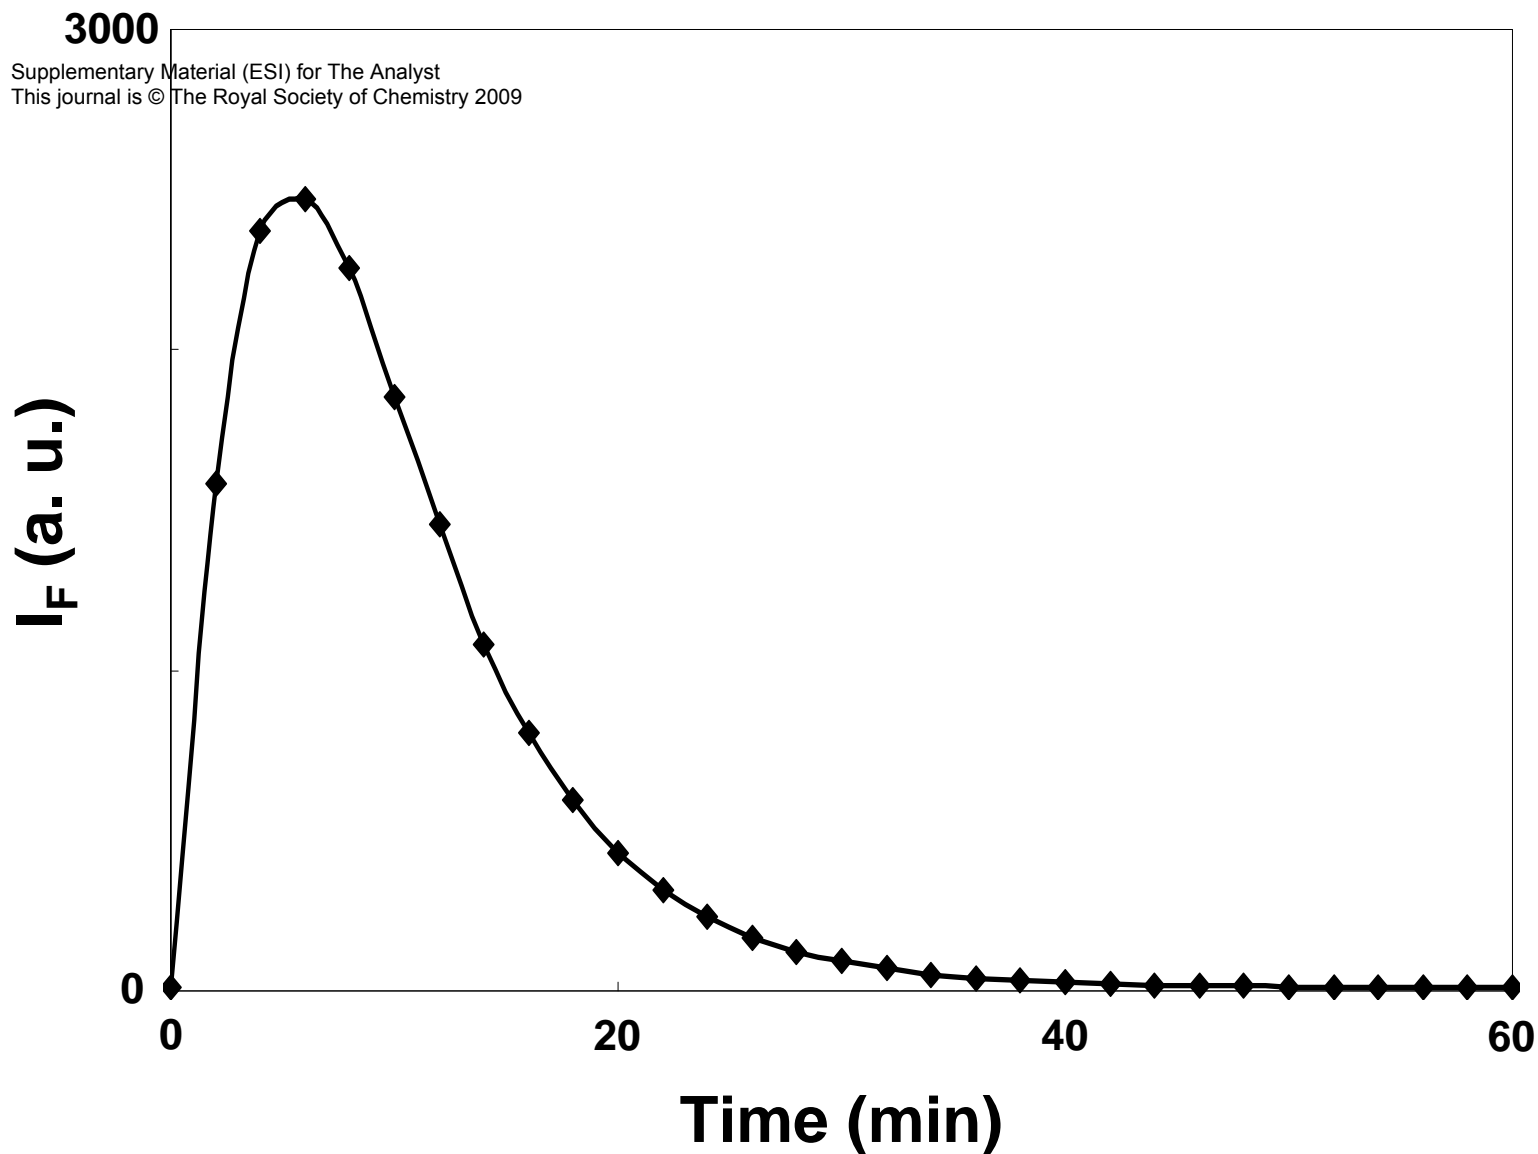

**Figure S3.** The time evolution of fluorescence intensity of OPA-derivatized histidine. The supernatant was obtained by centrifugation of a solution of 10  $\mu$ M histidine, 48.0 nM Tween 20-AuNPs and 0.1 mM CTAB. Then, the supernatant was derivatized with a solution of 1 mM OPA and 0.04 M NaOH. Tween 20-AuNPs were prepared in 40 mM phosphate solution at pH 2.0. The excitation wavelength was set at 360 nm.
